# Supplementary material for: MicroRNA expression profile and functional analysis reveal that miR-382 is a critical novel gene of alcohol addiction
Source: PubMed Central journal article supplement (PMC3799494; doi:10.1002/emmm.201201900), 2013-07-22
Supplement: emmm0005-1402-SD1.pdf [file emmm0005-1402-SD1.pdf]

## Supplementary Information

|                                                                                                                                                                    |          |
|--------------------------------------------------------------------------------------------------------------------------------------------------------------------|----------|
| <b>Supplementary Information .....</b>                                                                                                                             | <b>1</b> |
| <b>Table SI: Comparison of membrane properties of NAc MSNs in acute brain slices of rats received NAc injection of saline or Ad-miR-382.....</b>                   | <b>2</b> |
| <b>Table SII: PCR Primer Sequences.....</b>                                                                                                                        | <b>2</b> |
| <b>Figure S1: Delivery of Ad-miR-382 to the rat NAc increases the expression of miR-382 in NAc, but not in the neighboring brain areas.....</b>                    | <b>3</b> |
| <b>Figure S1I: The successful up-regulation of miR-382 via Ad-miR-382 in NAc of rats at 7 days after drinking of alcohol.....</b>                                  | <b>3</b> |
| <b>Figure SIII: The successful modulation of DRD1 and DeltaFosB via Ad-miR-382 was verified by Western blot analysis at 7 days after drinking of alcohol .....</b> | <b>4</b> |

**Table SI:** Comparison of membrane properties of NAc MSNs in acute brain slices of rats received NAc injection of saline or Ad-miR-382.

| Group                       | Saline or virus only | Ad miR-382             |
|-----------------------------|----------------------|------------------------|
| Number of neurons           | 29                   | 16                     |
| Passive membrane properties |                      |                        |
| RMP (mV)                    | -67.2 ± 3.0          | -62.2 ± 1.8 (P=0.16)   |
| R <sub>in</sub> (MΩ)        | 344±67               | 533±133 (P=0.29)       |
| Active membrane properties  |                      |                        |
| Current to generate AP (pA) | 66.00 ± 17.13        | 87.50 ± 11.97 (P=0.20) |
| AP threshold (mV)           | -31.7 ± 2.03         | -35.5 ± 2.3 (P=0.27)   |
| AP amplitude (mV)           | 62.9 ± 3.4           | 61.0 ± 3.2 (P=0.71)    |
| ½ AP duration (ms)          | 2.50 ± 0.18          | 2.3 ± 0.13 (P=0.65)    |
| AHP amplitude (mV)          | 6.6 ± 1.4            | 5.5 ± 0.6 (P=0.40)     |

Note: The passive and active membrane properties of medium spiny NAc neurons in acute brain slice were measured by current clamp recordings from rat injecting either Ad-miR-382 or saline, or virus only. Since the results of saline injected and virus only were not difference they were pooled together. Values represent the mean ± SEM for the number of neurons indicated. RMP: resting membrane potential; AP: action potential; AHP: after-hyperpolarization. R<sub>in</sub>, input resistance. The P values are obtained by t-test the difference between the two groups of neurons.

**Table SI: PCR Primer Sequences**

| Primer Names                        | Sequences (5' → 3')      |
|-------------------------------------|--------------------------|
| rat ΔFosB real-time forward primer  | GAGGAAAAGGCAGAGCTGGA     |
| rat ΔFosB real-time reverse primer  | TGGGCCACCAGGACAAACT      |
| rat DRD1 real-time forward primer   | ACTTCGGCTCTGAAATCAGTTTGG |
| rat DRD1 real-time reverse primer   | TCAACTCCTACCCTTCCTTTCTGG |
| mouse DRD1 real-time forward primer | GATGGCTCCTAACACTTCTACC   |
| mouse DRD1 real-time reverse primer | GGCTGTGAGGATGCGAAAG      |
| rat GAPDH real-time forward primer  | AAGCTCACTGGCATGGCCTT     |
| rat GAPDH real-time reverse primer  | CGGCATGTCAGATCCACAAC     |

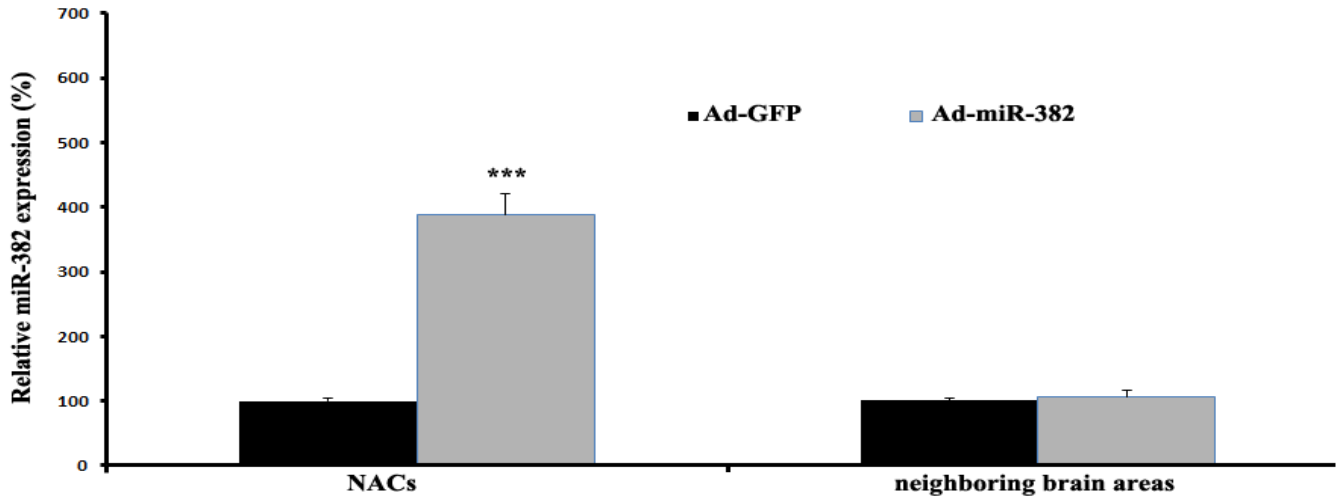

**Figure S1. Delivery of Ad-miR-382 to the rat NAc increases the expression of miR-382 in NAc, but not in the neighboring brain areas.** \*\*\* $P < 0.0001$ , Student's t-test. Ad-miR-382 ( $4\mu\text{l}$ ,  $1 \times 10^9$  pfu/ml) or the control virus ( $4\mu\text{l}$ , Ad-GFP) was injected bilaterally into NAc core using a Kopf stereotaxic frame. Injections were performed with two  $10\mu\text{l}$  Hamilton syringe fitted with a micropipette. Four  $\mu\text{l}$  per side were injected into the NAc core at a rate of  $0.1\mu\text{l}/\text{min}$ . At 5 days after injection, the rat NACs and neighboring brain areas ( $0.3\text{ cm}$  far from NAc) were isolated to determine the miR-382 levels by qRT-PCR. MiR-382 was increased via Ad-miR-382 in NACs ( $p = 1.22306\text{E-}5$ ), but not in the neighboring brain areas. Values are mean  $\pm$  SEM from 3 independent experiments ( $n=3$ ), compared with that in Ad-GFP control.

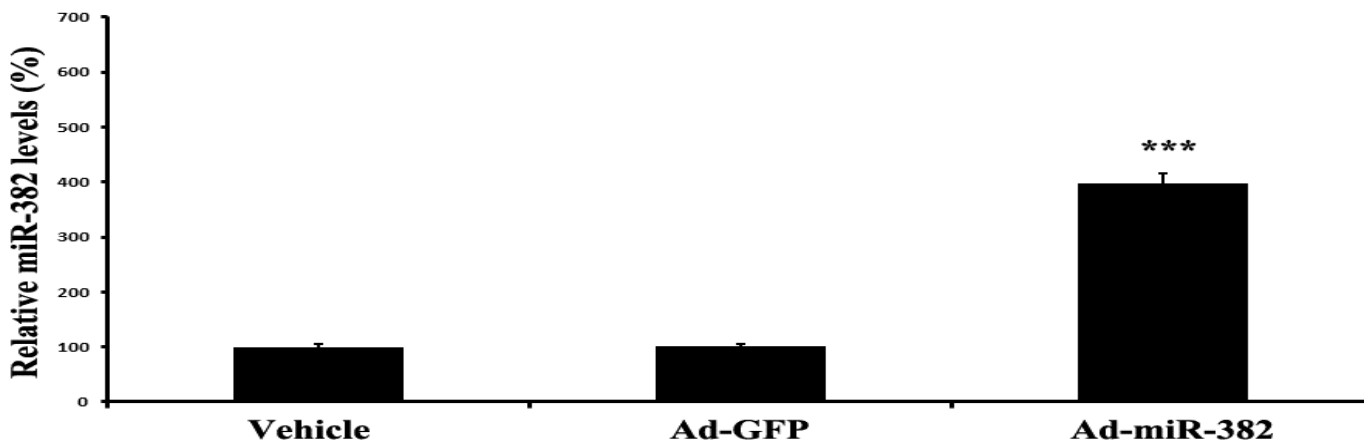

**Figure SII. The successful upregulation of miR-382 via Ad-miR-382 in NAc of rats at 7 days after drinking of alcohol.** \*\*\* $P < 0.0001$ , Student's t-test. The animals under the intermittent access two-bottle choice drinking paradigm were randomly divided into three groups which received infusion of Ad-miR-382, control adenovirus Ad-GFP, or vehicle (saline) respectively into the NAc. Seven days later, NAc were isolated to determine the levels of miR-382 via qRT-PCR. MiR-382 was overexpressed via Ad-miR-382 ( $p = 8.42076215208\text{E-}5$ ). Values are mean  $\pm$  SEM from 3 independent experiments ( $n=3$ ), compared with that in Ad-GFP control.

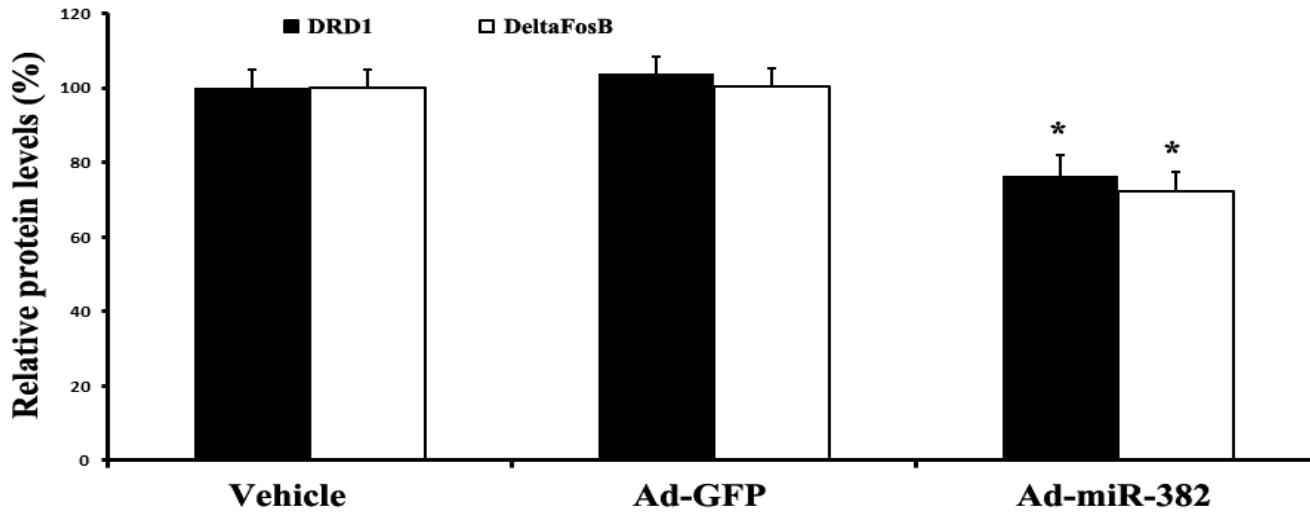

**Figure S111. The successful modulation of DRD1 and DeltaFosB via Ad-miR-382 in NAc of rats at 7 days after drinking of alcohol.** \* $P < 0.05$ , Student's t-test. The animals under the intermittent access two-bottle choice drinking paradigm were randomly divided into three groups which received infusion of Ad-miR-382, control adenovirus Ad-GFP, or vehicle (saline) respectively into the NAc. Seven days later, NAc were isolated to determine the levels of DRD1 and DeltaFosB by Western blot analysis. Both DRD1 ( $p = 0.01966$ ) and DeltaFosB ( $p = 0.01604$ ) were downregulated by Ad-miR-382. Values are mean  $\pm$  SEM from 3 independent experiments ( $n = 3$ ), compared with that in Ad-GFP control.
