# Supplementary material for: MicroRNA expression profile and functional analysis reveal that miR-382 is a critical novel gene of alcohol addiction
Source: PubMed Central journal article supplement (PMC3799494; doi:10.1002/emmm.201201900), 2013-07-22
Supplement: emmm0005-1402-SD3.pdf [file emmm0005-1402-SD3.pdf]

Source Data for Fig-2E

DRD1 → 49 kD

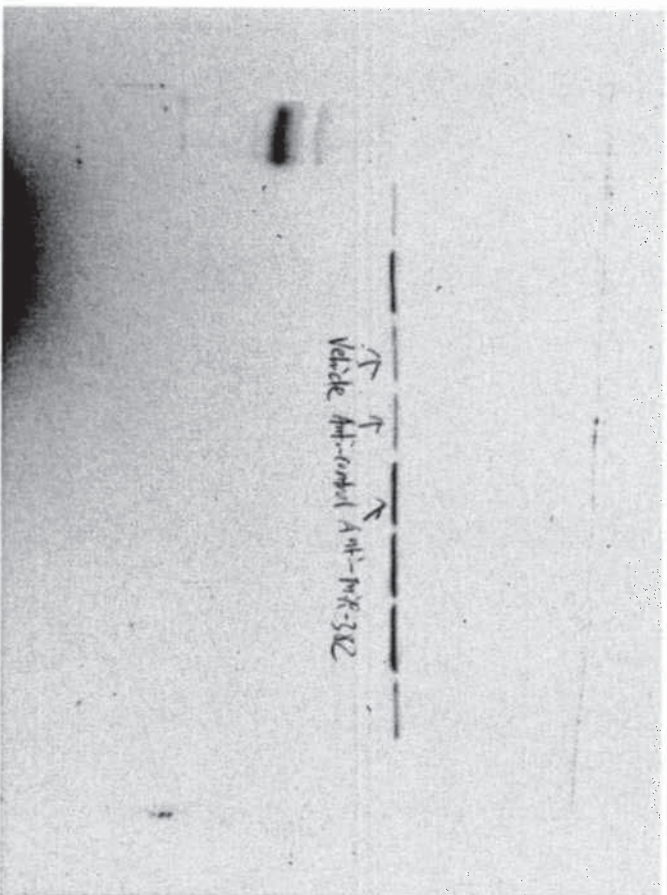

Source data for Fig-2F

50 kD →  
37 kD →

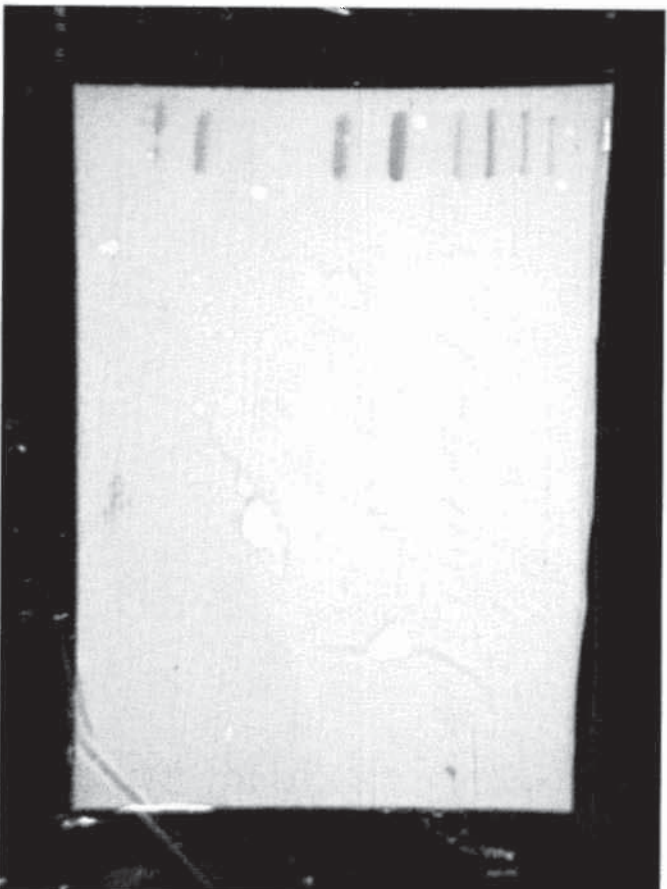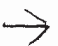

Molecular marker for DRP1-study

Source Data for Fig-2F

Delta F5B-37KD

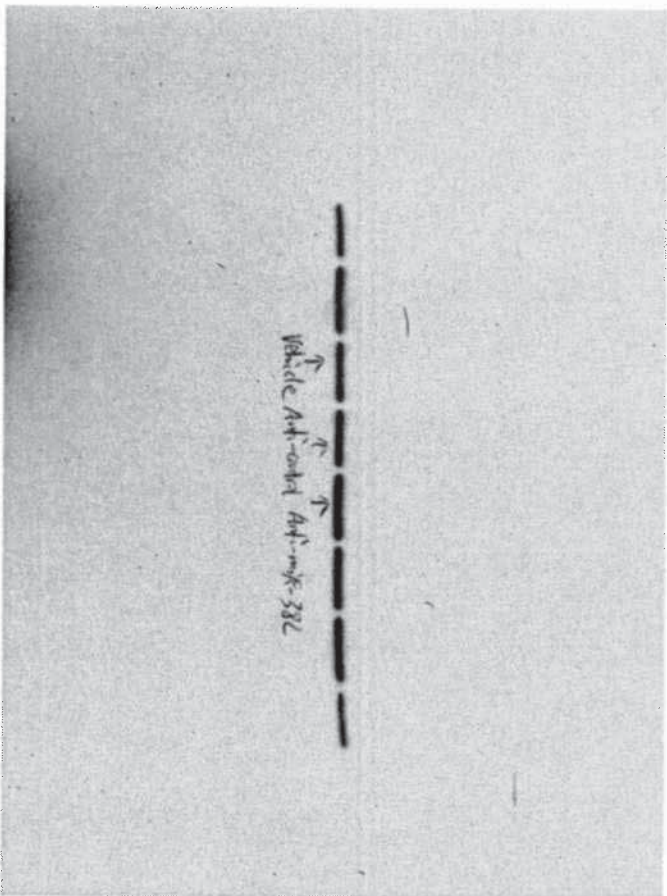

Source Data for Fig-2F

50KD →  
37KD →

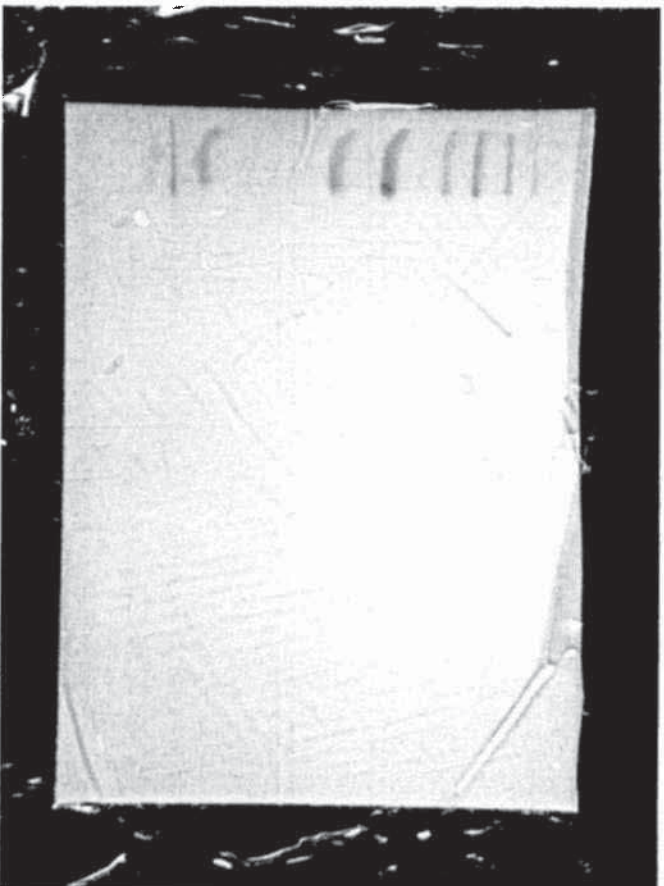

↑  
Molecular Marker for Delta FosB

Source data for Fig-2F

GAPDH →

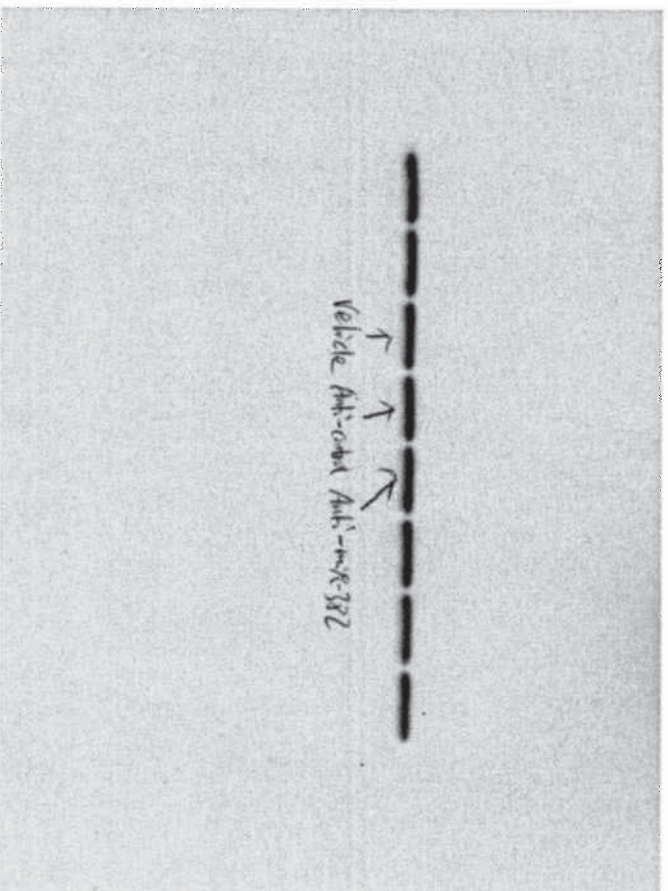

Source Data for Fig-2F

50KD →  
37KD →

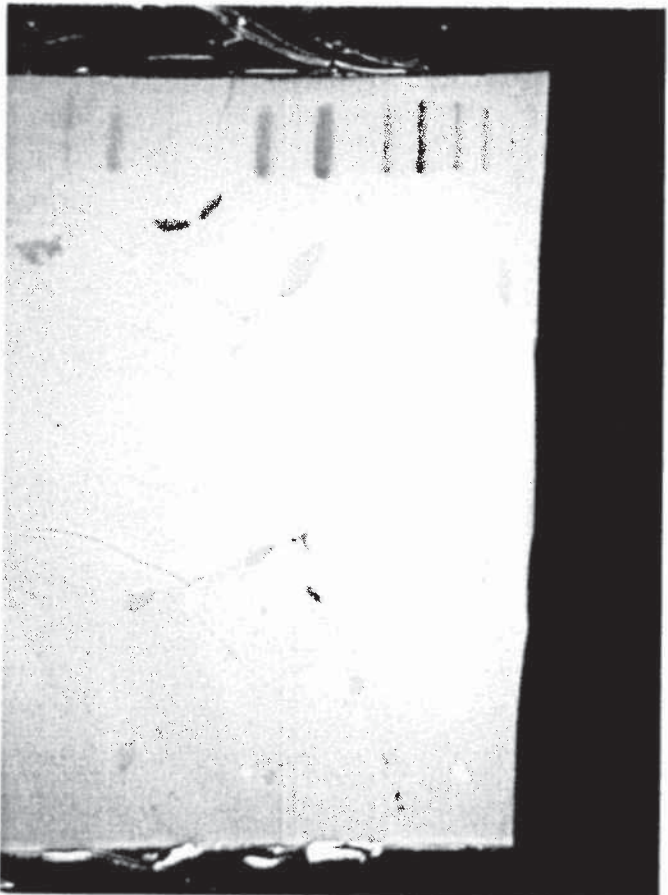

↑  
Molecular marker for GAPDH
