# Supplementary material for: MicroRNA expression profile and functional analysis reveal that miR-382 is a critical novel gene of alcohol addiction
Source: PubMed Central journal article supplement (PMC3799494; doi:10.1002/emmm.201201900), 2013-07-22
Supplement: emmm0005-1402-SD4.pdf [file emmm0005-1402-SD4.pdf]

Source Data for Fig-2H

DRD<sub>1</sub> → 49kD

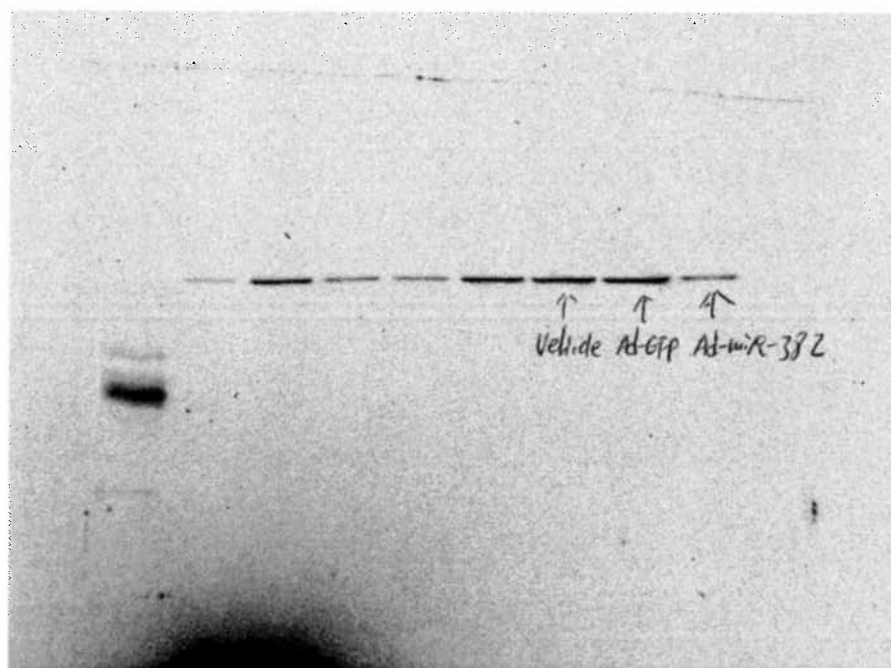

Source data for Fig-2H)

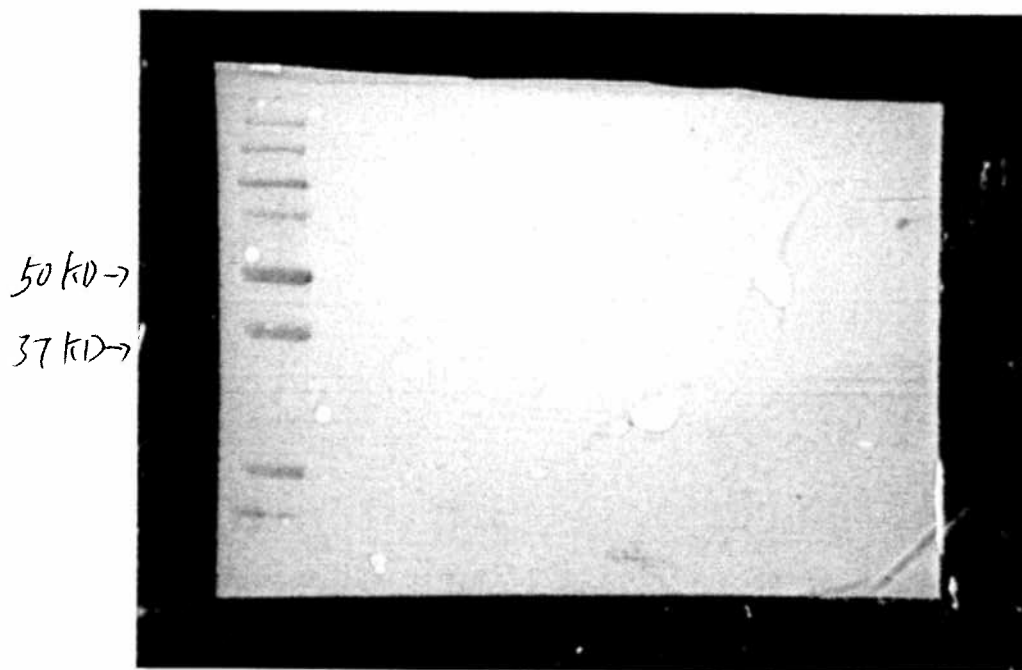

↑

Molecular marker for DRD1-study

Source data for Fig-2H

Delta-Fos B → 37kD

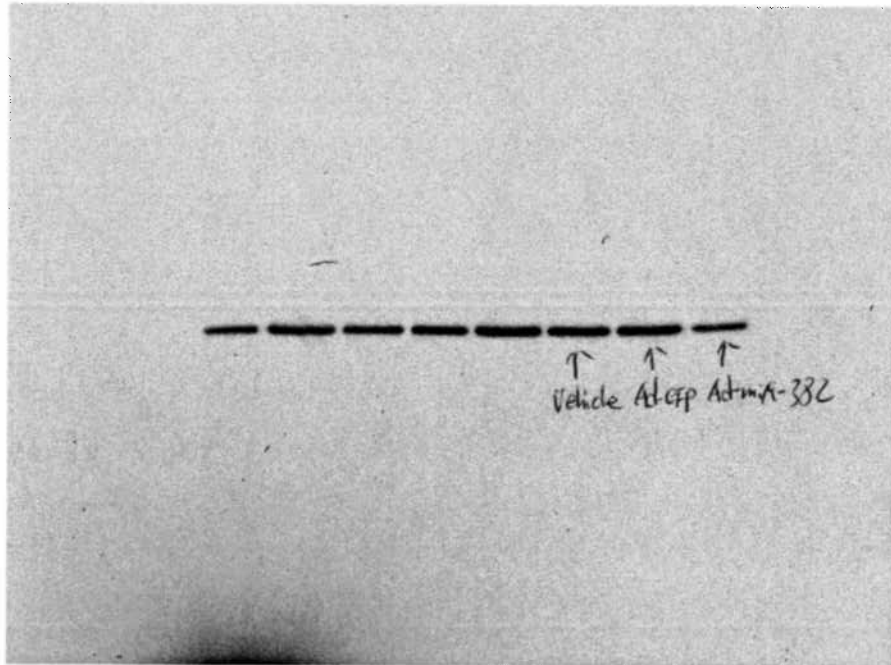

Source Data for Fig-2H

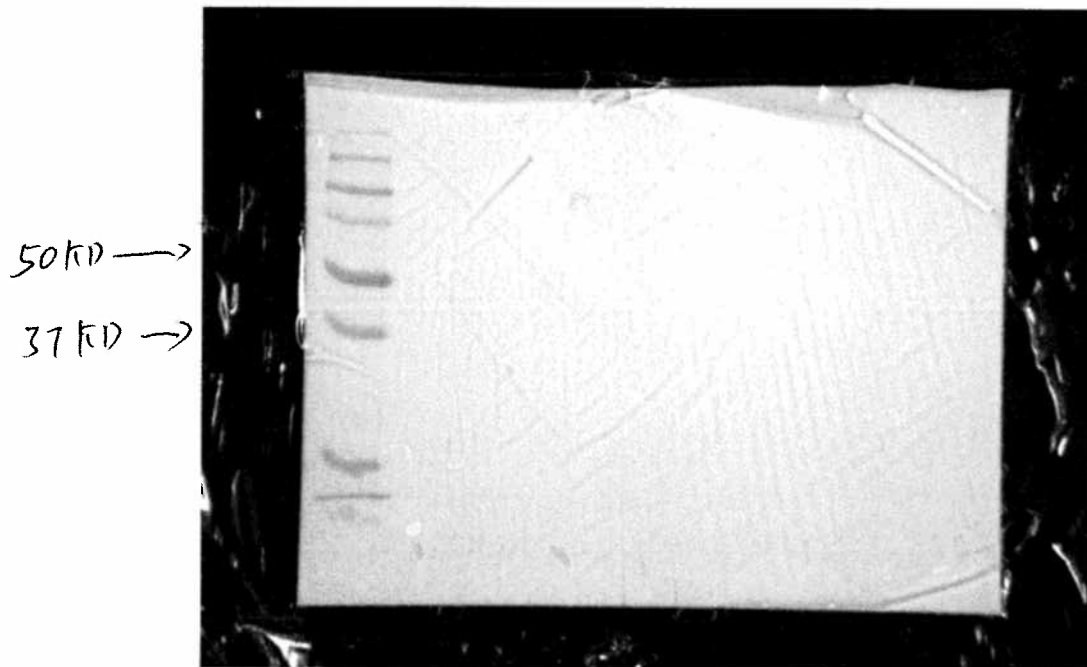

↑  
Molecular marker for Delta FosB

Source data for Fig-2H

GAPDH →

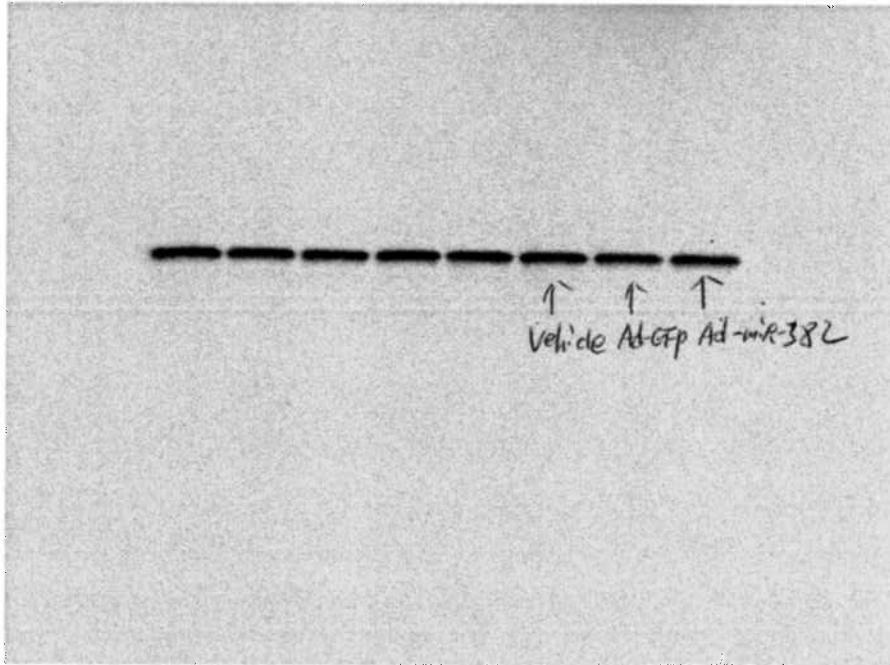

source data for Fig-2H

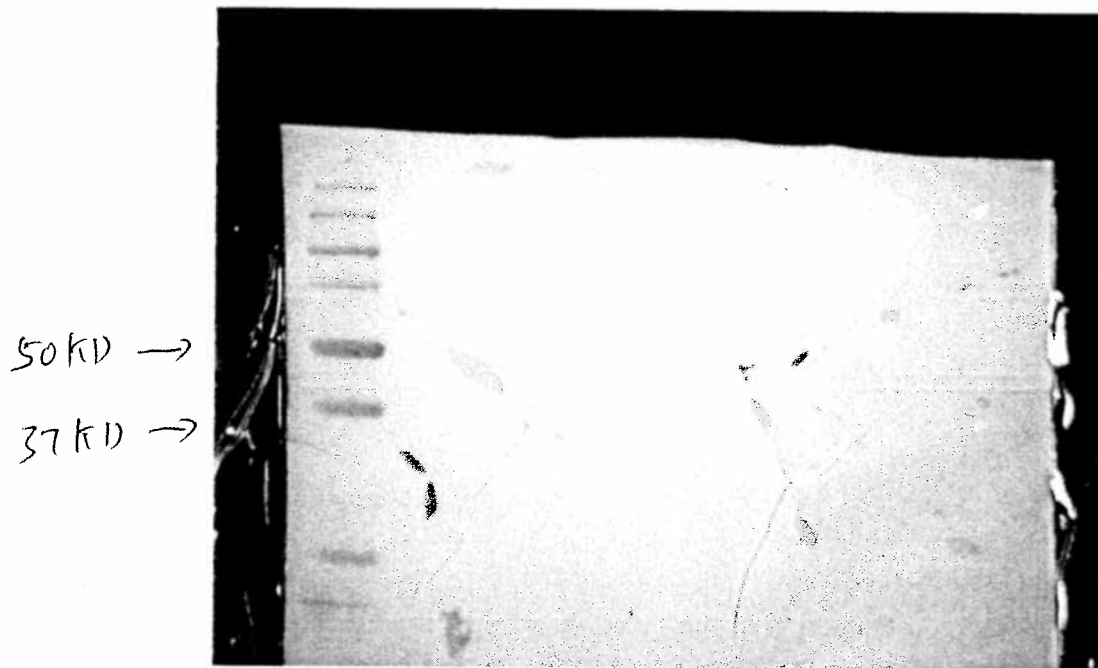

↑

Molecular marker for GAPDH
