# Supplementary material for: MicroRNA expression profile and functional analysis reveal that miR-382 is a critical novel gene of alcohol addiction
Source: PubMed Central journal article supplement (PMC3799494; doi:10.1002/emmm.201201900), 2013-07-22
Supplement: emmm0005-1402-SD6.pdf [file emmm0005-1402-SD6.pdf]

Source Data for Fig - 4B

PRD1 → 49 kD

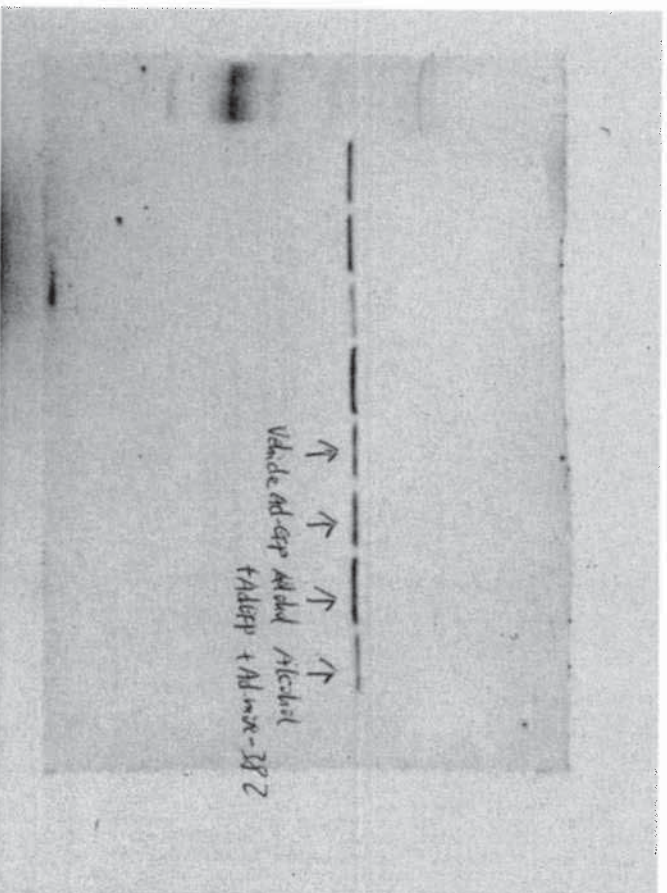

Source Data for Fig-4B

50 kD →  
37 kD →

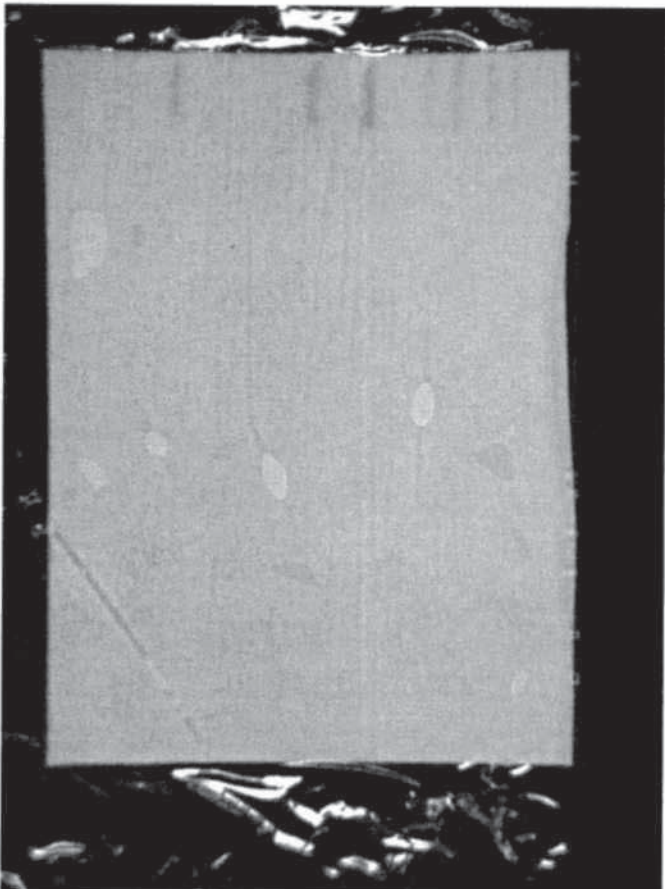

↓  
Molecular Marker for PADI- Study

Source data for Fig-4B

Delta FSB  $\rightarrow$  3711D

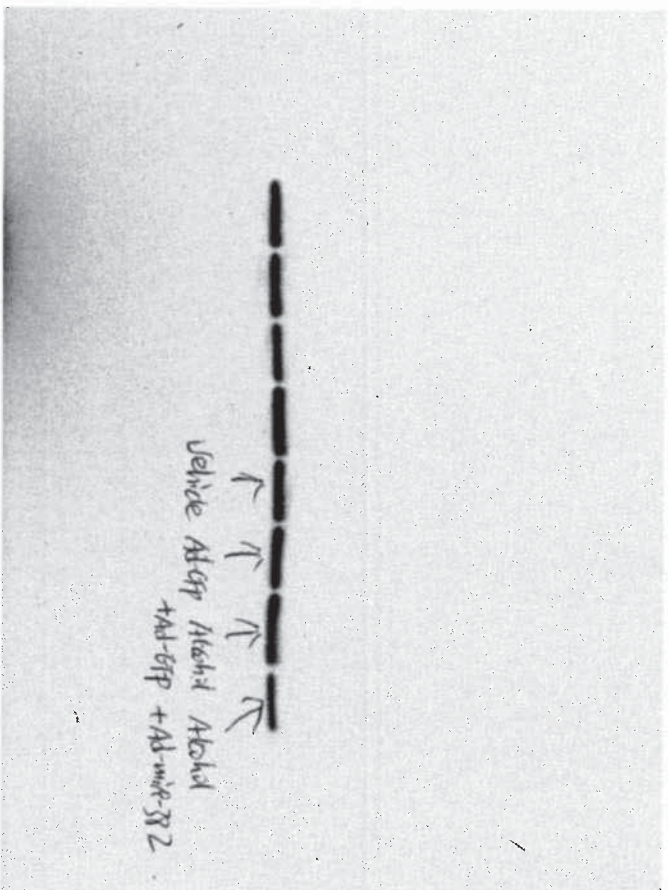

Source Data for Fig - 2B

50 KD →  
37 KD →

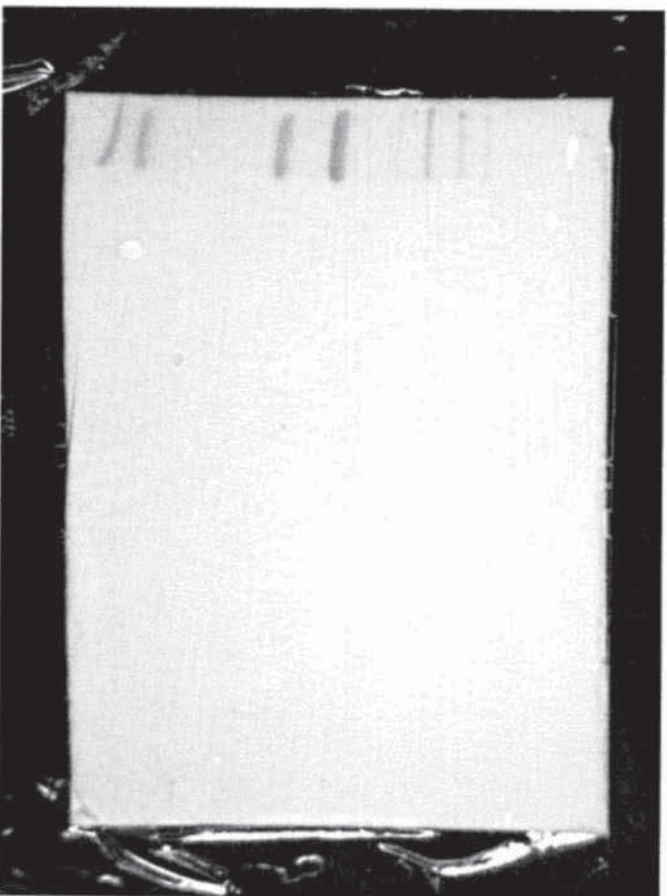

↑  
Molecular Marker for Delta FosR

Source Data for Fig-4B

GAPDH →

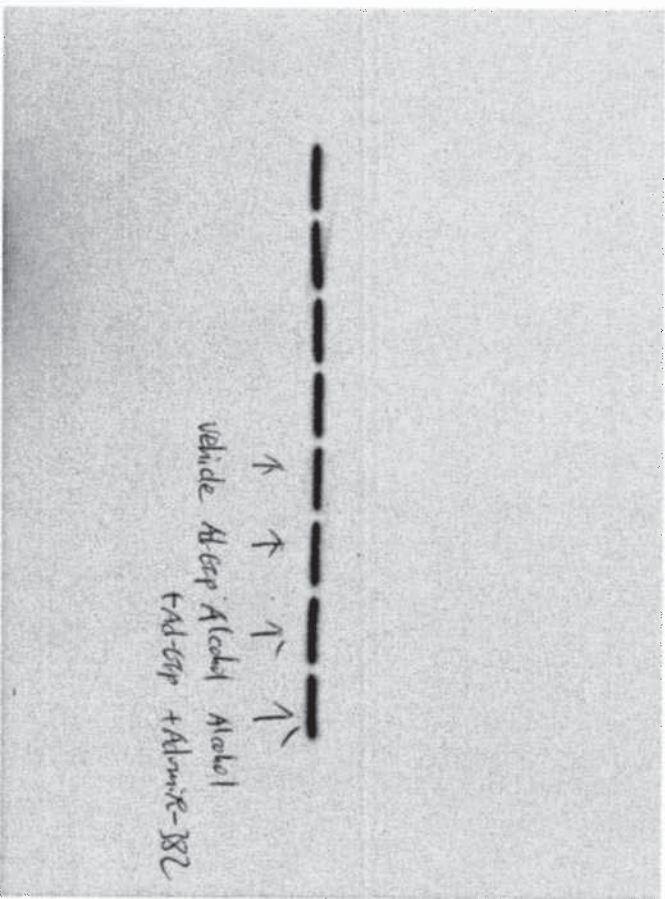

Source data for Fig-4B

50 k) -  
37 k) ->

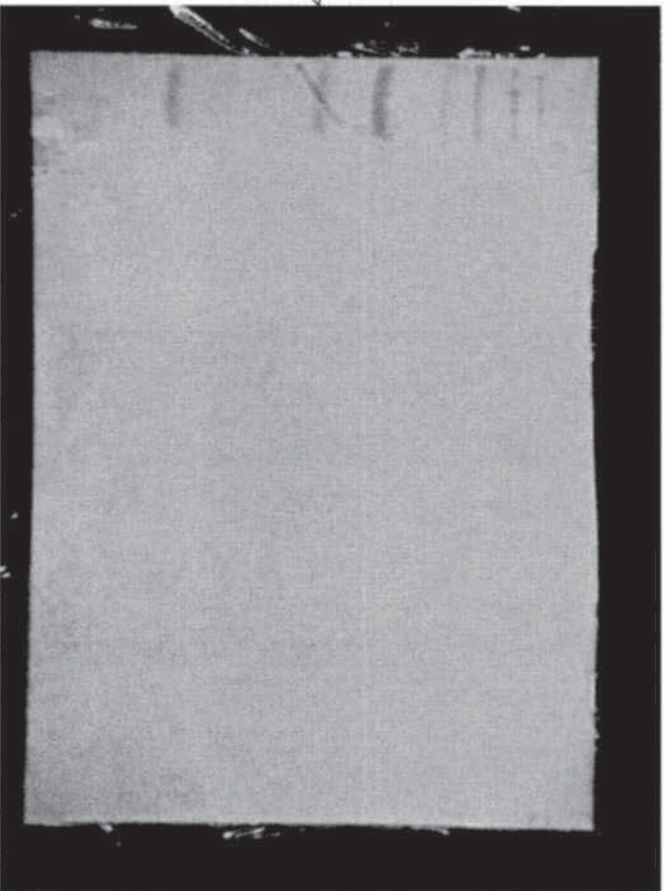

↑  
Molecular number for GAPDH-1
