# Supplementary material for: MicroRNA expression profile and functional analysis reveal that miR-382 is a critical novel gene of alcohol addiction
Source: PubMed Central journal article supplement (PMC3799494; doi:10.1002/emmm.201201900), 2013-07-22
Supplement: emmm0005-1402-SD7.pdf [file emmm0005-1402-SD7.pdf]

## MicroRNA Expression Profile and Functional Analysis Reveal that miR-382 is a Critical Novel Gene of Alcohol Addiction

Jingyuan Li, Jing Li, Xiaojun Liu, Shanshan Qin, Yanzhong Guan, Yuwei Liu, Yunhui Cheng,  
Xiuwen Chen, Wen Li, Shenming Wang, Ming Xiong, Eldo V. Kuzhikandathil, Jiang-Hong Ye,  
Chunxiang Zhang

*Corresponding author: Chunxiang Zhang, Rush Medical College, Rush University*

---

### Review timeline:

Submission date:  
Accepted:

17 August 2012  
17 June 2013

---

*Editor: Natascha Bushati / Céline Carret*

### Transaction Report:

No Peer Review Process File is available with this article, as the authors have chosen not to make the review process public in this case.
